# Supplementary material for: Use of systemic corticosteroids for atopic dermatitis: International Eczema Council consensus statement
Source: PubMed Central journal article supplement — Br J Dermatol. 2018 Jan 28;178(3):768–75. doi: 10.1111/bjd.15928 (PMC5901393; doi:10.1111/bjd.15928), 2018-01-28
Supplement: BJD-178-768-s002.pdf [file BJD-178-768-s002.pdf]

# Systemic steroids consensus project

Thank you for participating in this consensus exercise among the International Eczema Council Councilors and Associates.

You will be presented with a number of statements related to the use of systemic corticosteroids for atopic dermatitis. For each statement, you will be asked to mark whether you agree or disagree with a statement on a visual analog scale from "strongly disagree" to "neutral" to "strongly agree."

For each statement, if no more than 30% of participants mark on the left side of the scale (towards strongly disagree), then consensus will have been reached in favor of that statement.

Thank you again for your participation in this IEC project!

---



---

## Children under 12

- 1) For CHILDREN under the age of 12, given concerns of side effects and rebound flares on discontinuation, systemic corticosteroids should never be used in the treatment of severe atopic dermatitis.

Strongly disagree                      Neutral                      Strongly agree

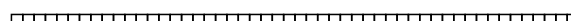

*(Place a mark on the scale above)*

- 2) For CHILDREN under the age of 12, given concerns of side effects and rebound flares on discontinuation, systemic corticosteroids should generally be avoided in the treatment of severe atopic dermatitis.

Strongly disagree                      Neutral                      Strongly agree

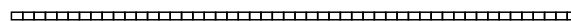

*(Place a mark on the scale above)*

- 3) For CHILDREN under the age of 12, given concerns of side effects and rebound flares on discontinuation, systemic corticosteroids may be used rarely for severe atopic dermatitis.

Strongly disagree                      Neutral                      Strongly agree

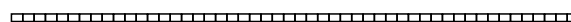

*(Place a mark on the scale above)*

- 4) For CHILDREN under the age of 12, given concerns of side effects and rebound flares on discontinuation, systemic corticosteroids may be used regularly for severe atopic dermatitis.

Strongly disagree                      Neutral                      Strongly agree

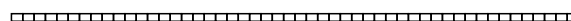

*(Place a mark on the scale above)*

- 5) Please use this space to provide any comments you have on the use of systemic corticosteroids for severe atopic dermatitis in children under 12, including any clarification you would like to provide on your answer choices.

---

---

---

**Children 12-17**

6) For CHILDREN between 12 and 17 years of age, given concerns of side effects and rebound flares on discontinuation, systemic corticosteroids should never be used in the treatment of severe atopic dermatitis.

Strongly disagree                      Neutral                      Strongly agree

=====

*(Place a mark on the scale above)*

7) For CHILDREN between 12 and 17 years of age, given concerns of side effects and rebound flares on discontinuation, systemic corticosteroids should generally be avoided in the treatment of severe atopic dermatitis.

Strongly disagree                      Neutral                      Strongly agree

=====

*(Place a mark on the scale above)*

8) For CHILDREN between 12 and 17 years of age, given concerns of side effects and rebound flares on discontinuation, systemic corticosteroids may be used rarely for severe atopic dermatitis.

Strongly disagree                      Neutral                      Strongly agree

=====

*(Place a mark on the scale above)*

9) For CHILDREN between 12 and 17 years of age, given concerns of side effects and rebound flares on discontinuation, systemic corticosteroids may be used regularly for severe atopic dermatitis.

Strongly disagree                      Neutral                      Strongly agree

=====

*(Place a mark on the scale above)*

10) Please use this space to provide any comments you have on the use of systemic corticosteroids for severe atopic dermatitis in children aged 12-17, including any clarification you would like to provide on your answer choices.

---

---

---

**Adults**

11) For ADULTS 18 and over, given concerns of side effects and rebound flares on discontinuation, systemic corticosteroids should never be used in the treatment of severe atopic dermatitis.

Strongly disagree                      Neutral                      Strongly agree

=====

*(Place a mark on the scale above)*

12) For ADULTS 18 and over, given concerns of side effects and rebound flares on discontinuation, systemic corticosteroids should generally be avoided in the treatment of severe atopic dermatitis.

Strongly disagree                      Neutral                      Strongly agree

=====

*(Place a mark on the scale above)*

13) For ADULTS 18 and over, given concerns of side effects and rebound flares on discontinuation, systemic corticosteroids may be used rarely for severe atopic dermatitis.

Strongly disagree                      Neutral                      Strongly agree

=====

*(Place a mark on the scale above)*

14) For ADULTS 18 and over, given concerns of side effects and rebound flares on discontinuation, systemic corticosteroids may be used regularly for severe atopic dermatitis.

Strongly disagree                      Neutral                      Strongly agree

=====

*(Place a mark on the scale above)*

15) Please use this space to provide any comments you have on the use of systemic corticosteroids for severe atopic dermatitis in adults, including any clarification you would like to provide on your answer choices.

\_\_\_\_\_

---



---

**Specific circumstances**

16) Systemic corticosteroids may be used for severe atopic dermatitis when there are no other viable treatment options.

Strongly disagree                      Neutral                      Strongly agree

=====

*(Place a mark on the scale above)*

17) Systemic corticosteroids may be used for severe atopic dermatitis as a bridge to other systemic agents or phototherapy.

Strongly disagree                      Neutral                      Strongly agree

=====

*(Place a mark on the scale above)*

18) Systemic corticosteroids may be used for severe atopic dermatitis not responding to topical therapy.

Strongly disagree                      Neutral                      Strongly agree

=====

*(Place a mark on the scale above)*

19) Systemic corticosteroids may be used for severe atopic dermatitis not responding to other systemic medications or phototherapy.

Strongly disagree                      Neutral                      Strongly agree

=====

*(Place a mark on the scale above)*

20) Systemic corticosteroids may be used for severe atopic dermatitis in an acute flare in need of immediate relief.

Strongly disagree                      Neutral                      Strongly agree

=====

*(Place a mark on the scale above)*

21) Systemic corticosteroids may be used for severe atopic dermatitis in anticipation of an important life event (eg. wedding).

Strongly disagree                      Neutral                      Strongly agree

=====

*(Place a mark on the scale above)*

22) Systemic corticosteroids may be used for severe atopic dermatitis in cases that are the most severe (eg. erythrodermic).

Strongly disagree                      Neutral                      Strongly agree

=====

*(Place a mark on the scale above)*

23) Systemic corticosteroids may be used for severe atopic dermatitis in pregnancy.

Strongly disagree                      Neutral                      Strongly agree

=====

*(Place a mark on the scale above)*

24) Please use this space to provide any comments you have on the use of systemic corticosteroids for severe atopic dermatitis in specific circumstances, including any clarification you would like to provide on your answer choices.

\_\_\_\_\_

---

---

### Timing and dose

25) If used, treatment with systemic corticosteroids for severe atopic dermatitis should be limited to short-term use.

Strongly disagree                      Neutral                      Strongly agree

=====

(Place a mark on the scale above)

26) If used, treatment with systemic corticosteroids for severe atopic dermatitis should be limited to no more than 2 weeks.

Strongly disagree                      Neutral                      Strongly agree

=====

(Place a mark on the scale above)

27) If used, treatment with systemic corticosteroids for severe atopic dermatitis should be limited to no more than 4 weeks.

Strongly disagree                      Neutral                      Strongly agree

=====

(Place a mark on the scale above)

28) If used, treatment with systemic corticosteroids for severe atopic dermatitis should be limited to no more than 6 weeks.

Strongly disagree                      Neutral                      Strongly agree

=====

(Place a mark on the scale above)

29) If used, treatment with systemic corticosteroids for severe atopic dermatitis should be tapered slowly over weeks.

Strongly disagree                      Neutral                      Strongly agree

=====

(Place a mark on the scale above)

30) If used, treatment with systemic corticosteroids for severe atopic dermatitis should be low dose.

Strongly disagree                      Neutral                      Strongly agree

=====

(Place a mark on the scale above)

31) Please use this space to provide any comments you have on the timing and dosing systemic corticosteroids for severe atopic dermatitis, including any clarification you would like to provide on your answer choices.

---

---

---

**Thank you for completing the survey!**

- 32) Please use this space to provide any further comments on the subject of the use of systemic corticosteroids for severe atopic dermatitis.
-
