# Supplementary material for: Use of systemic corticosteroids for atopic dermatitis: International Eczema Council consensus statement
Source: PubMed Central journal article supplement — Br J Dermatol. 2018 Jan 28;178(3):768–75. doi: 10.1111/bjd.15928 (PMC5901393; doi:10.1111/bjd.15928), 2018-01-28
Supplement: BJD-178-768-s003.pdf [file BJD-178-768-s003.pdf]

## Systemic steroids for atopic dermatitis

### Data Exports, Reports, and Stats

#### All data (all records and fields)

**For CHILDREN under the age of 12, given concerns of side effects and rebound flares on discontinuation, systemic corticosteroids should never be used in the treatment of severe atopic dermatitis.**

| Total Count (N) | Missing  | Unique | Min  | Max    | Mean  | StDev | Sum      | Percentile |      |       |             |       |       |        |
|-----------------|----------|--------|------|--------|-------|-------|----------|------------|------|-------|-------------|-------|-------|--------|
|                 |          |        |      |        |       |       |          | 0.05       | 0.10 | 0.25  | 0.50 Median | 0.75  | 0.90  | 0.95   |
| 58              | 1 (1.7%) | 36     | 0.00 | 100.00 | 50.95 | 34.10 | 2,955.00 | 0.00       | 0.00 | 18.25 | 61.50       | 79.00 | 92.40 | 100.00 |

Lowest values: 0, 0, 0, 0, 0

Highest values: 98, 100, 100, 100, 100

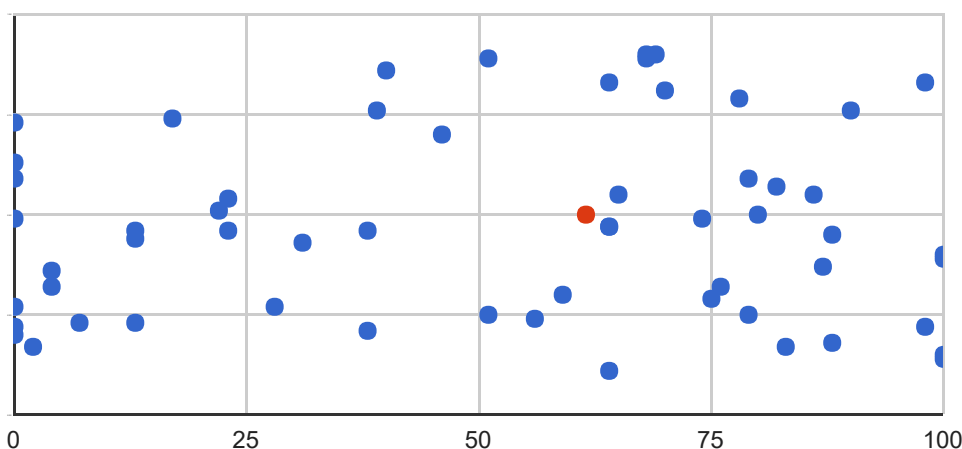

[Download image](#)

**For CHILDREN under the age of 12, given concerns of side effects and rebound flares on discontinuation, systemic corticosteroids should generally be avoided in the treatment of severe atopic dermatitis.**

| Total Count (N) | Missing  | Unique | Min  | Max    | Mean  | StDev | Sum      | Percentile |       |       |             |        |        |        |
|-----------------|----------|--------|------|--------|-------|-------|----------|------------|-------|-------|-------------|--------|--------|--------|
|                 |          |        |      |        |       |       |          | 0.05       | 0.10  | 0.25  | 0.50 Median | 0.75   | 0.90   | 0.95   |
| 59              | 0 (0.0%) | 28     | 1.00 | 100.00 | 79.90 | 27.85 | 4,714.00 | 19.60      | 27.40 | 76.00 | 91.00       | 100.00 | 100.00 | 100.00 |

Lowest values: 1, 6, 16, 20, 21

Highest values: 100, 100, 100, 100, 100

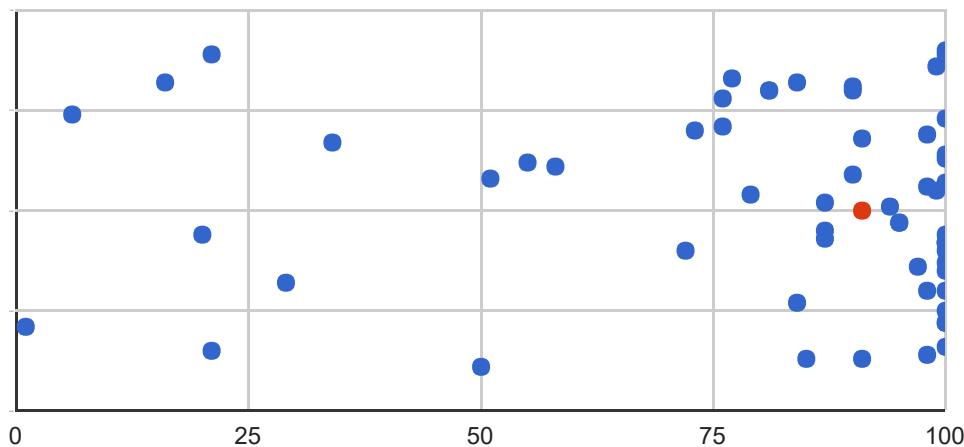

[Download image](#)

**For CHILDREN under the age of 12, given concerns of side effects and rebound flares on discontinuation, systemic corticosteroids may be used rarely for severe atopic dermatitis.**

| Total Count (N) | Missing  | Unique | Min  | Max    | Mean  | StDev | Sum      | Percentile |      |       |             |       |       |        |
|-----------------|----------|--------|------|--------|-------|-------|----------|------------|------|-------|-------------|-------|-------|--------|
|                 |          |        |      |        |       |       |          | 0.05       | 0.10 | 0.25  | 0.50 Median | 0.75  | 0.90  | 0.95   |
| 58              | 1 (1.7%) | 41     | 0.00 | 100.00 | 61.95 | 32.68 | 3,593.00 | 4.40       | 6.70 | 36.00 | 72.50       | 87.00 | 98.30 | 100.00 |

**Lowest values:** 0, 0, 1, 5, 6

**Highest values:** 100, 100, 100, 100, 100

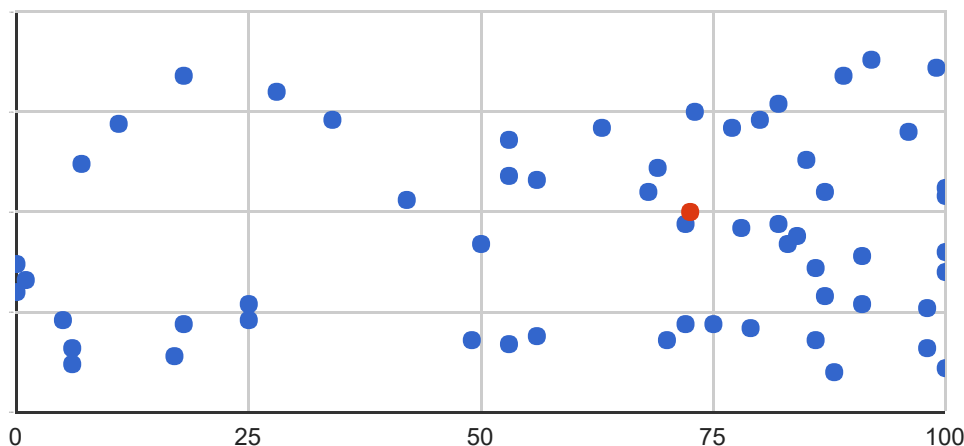

[Download image](#)

**For CHILDREN under the age of 12, given concerns of side effects and rebound flares on discontinuation, systemic corticosteroids may be used regularly for severe atopic dermatitis.**

| Total Count (N) | Missing  | Unique | Min  | Max    | Mean  | StDev | Sum    | Percentile |      |      |             |       |       |       |
|-----------------|----------|--------|------|--------|-------|-------|--------|------------|------|------|-------------|-------|-------|-------|
|                 |          |        |      |        |       |       |        | 0.05       | 0.10 | 0.25 | 0.50 Median | 0.75  | 0.90  | 0.95  |
| 59              | 0 (0.0%) | 21     | 0.00 | 100.00 | 11.61 | 22.75 | 685.00 | 0.00       | 0.00 | 0.00 | 1.00        | 12.00 | 32.00 | 53.70 |

**Lowest values:** 0, 0, 0, 0, 0

**Highest values:** 38, 50, 87, 100, 100

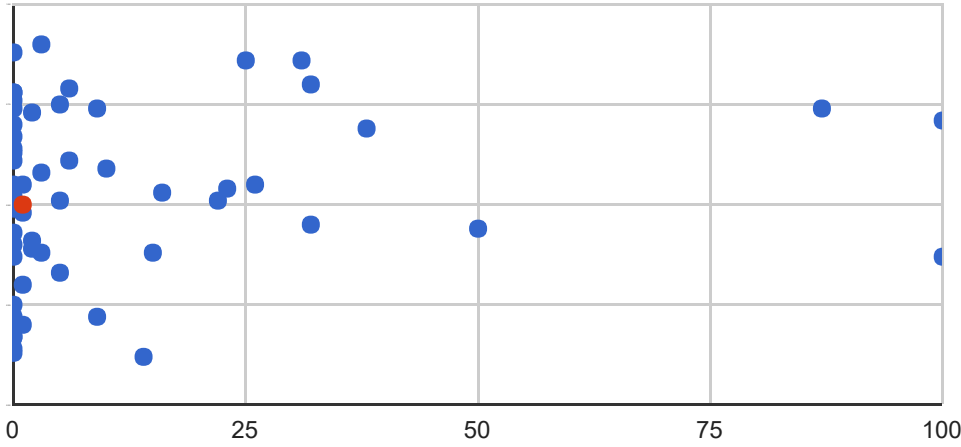

[Download image](#)

**Please use this space to provide any comments you have on the use of systemic corticosteroids for severe atopic dermatitis in children under 12, including any clarification you would like to provide on your answer choices.**

| Total Count (N) | Missing    |
|-----------------|------------|
| 20              | 39 (66.1%) |

**For CHILDREN between 12 and 17 years of age, given concerns of side effects and rebound flares on discontinuation, systemic corticosteroids should never be used in the treatment of severe atopic dermatitis.**

| Total Count (N) | Missing  | Unique | Min  | Max    | Mean  | StDev | Sum      | Percentile |      |       |             |       |       |        |
|-----------------|----------|--------|------|--------|-------|-------|----------|------------|------|-------|-------------|-------|-------|--------|
|                 |          |        |      |        |       |       |          | 0.05       | 0.10 | 0.25  | 0.50 Median | 0.75  | 0.90  | 0.95   |
| 56              | 3 (5.1%) | 38     | 0.00 | 100.00 | 50.07 | 35.18 | 2,804.00 | 0.00       | 0.00 | 14.50 | 58.00       | 80.25 | 95.50 | 100.00 |

Lowest values: 0, 0, 0, 0, 0

Highest values: 100, 100, 100, 100, 100

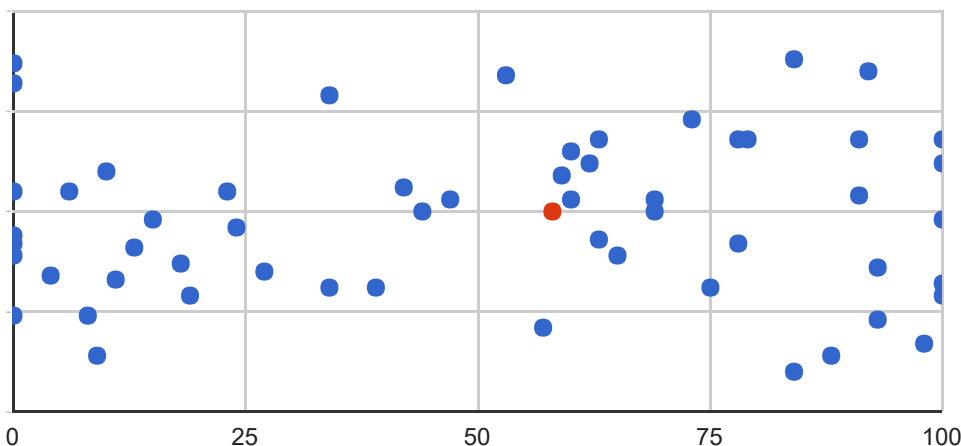

[Download image](#)

**For CHILDREN between 12 and 17 years of age, given concerns of side effects and rebound flares on discontinuation, systemic corticosteroids should generally be avoided in the treatment of severe atopic dermatitis.**

| Total Count (N) | Missing  | Unique | Min  | Max    | Mean  | StDev | Sum      | Percentile |       |       |             |        |        |        |
|-----------------|----------|--------|------|--------|-------|-------|----------|------------|-------|-------|-------------|--------|--------|--------|
|                 |          |        |      |        |       |       |          | 0.05       | 0.10  | 0.25  | 0.50 Median | 0.75   | 0.90   | 0.95   |
| 56              | 3 (5.1%) | 28     | 0.00 | 100.00 | 78.73 | 28.96 | 4,409.00 | 13.75      | 22.50 | 71.75 | 91.50       | 100.00 | 100.00 | 100.00 |

Lowest values: 0, 11, 13, 14, 14

Highest values: 100, 100, 100, 100, 100

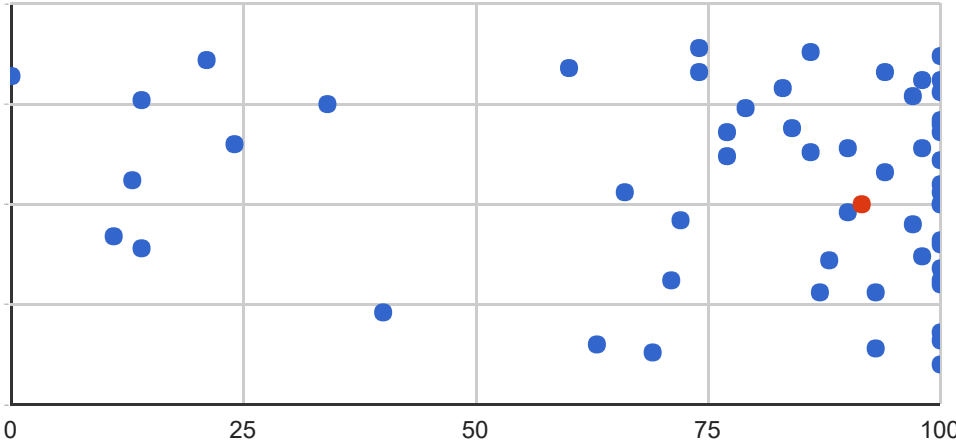

[Download image](#)

**For CHILDREN between 12 and 17 years of age, given concerns of side effects and rebound flares on discontinuation, systemic corticosteroids may be used rarely for severe atopic dermatitis.**

| Total Count (N) | Missing  | Unique | Min  | Max    | Mean  | StDev | Sum      | Percentile |       |       |             |       |        |        |
|-----------------|----------|--------|------|--------|-------|-------|----------|------------|-------|-------|-------------|-------|--------|--------|
|                 |          |        |      |        |       |       |          | 0.05       | 0.10  | 0.25  | 0.50 Median | 0.75  | 0.90   | 0.95   |
| 56              | 3 (5.1%) | 37     | 0.00 | 100.00 | 65.30 | 32.19 | 3,657.00 | 3.00       | 16.50 | 45.25 | 78.50       | 92.00 | 100.00 | 100.00 |

Lowest values: 0, 0, 0, 4, 12

Highest values: 100, 100, 100, 100, 100

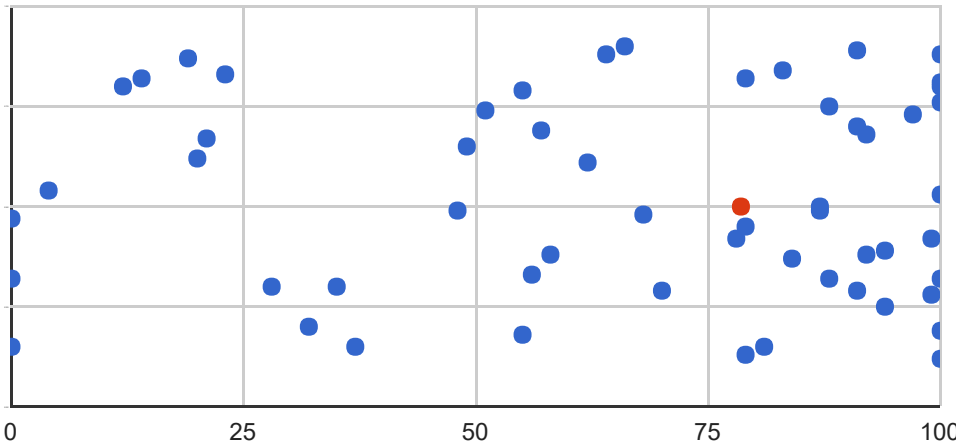

[Download image](#)

**For CHILDREN between 12 and 17 years of age, given concerns of side effects and rebound flares on discontinuation, systemic corticosteroids may be used regularly for severe atopic dermatitis.**

| Total Count (N) | Missing  | Unique | Min  | Max    | Mean | StDev | Sum    | Percentile |      |      |             |      |       |       |
|-----------------|----------|--------|------|--------|------|-------|--------|------------|------|------|-------------|------|-------|-------|
|                 |          |        |      |        |      |       |        | 0.05       | 0.10 | 0.25 | 0.50 Median | 0.75 | 0.90  | 0.95  |
| 56              | 3 (5.1%) | 17     | 0.00 | 100.00 | 9.45 | 20.51 | 529.00 | 0.00       | 0.00 | 0.00 | 0.50        | 9.00 | 31.50 | 54.25 |

Lowest values: 0, 0, 0, 0, 0

Highest values: 34, 52, 61, 83, 100

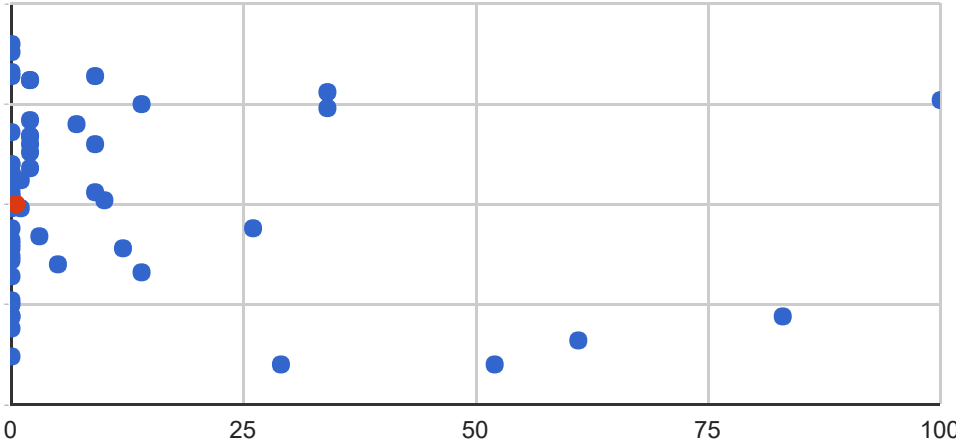

[Download image](#)

**Please use this space to provide any comments you have on the use of systemic corticosteroids for severe atopic dermatitis in children aged 12-17, including any clarification you would like to provide on your answer choices.**

| Total Count (N) | Missing    |
|-----------------|------------|
| 14              | 45 (76.3%) |

**For ADULTS 18 and over, given concerns of side effects and rebound flares on discontinuation, systemic corticosteroids should never be used in the treatment of severe atopic dermatitis.**

| Total Count (N) | Missing  | Unique | Min  | Max    | Mean  | StDev | Sum      | Percentile |      |      |             |       |       |        |
|-----------------|----------|--------|------|--------|-------|-------|----------|------------|------|------|-------------|-------|-------|--------|
|                 |          |        |      |        |       |       |          | 0.05       | 0.10 | 0.25 | 0.50 Median | 0.75  | 0.90  | 0.95   |
| 55              | 4 (6.8%) | 36     | 0.00 | 100.00 | 42.75 | 35.05 | 2,351.00 | 0.00       | 0.00 | 7.50 | 39.00       | 75.00 | 94.40 | 100.00 |

Lowest values: 0, 0, 0, 0, 0

Highest values: 100, 100, 100, 100, 100

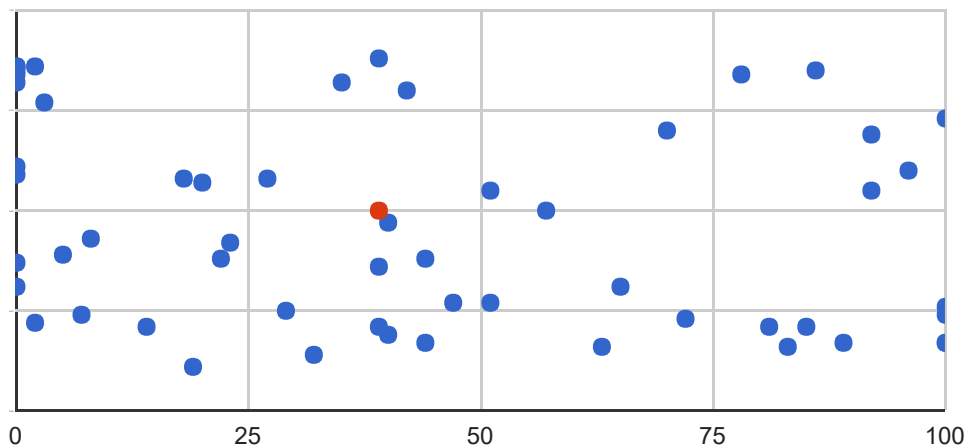

[Download image](#)

**For ADULTS 18 and over, given concerns of side effects and rebound flares on discontinuation, systemic corticosteroids should generally be avoided in the treatment of severe atopic dermatitis.**

| Total Count (N) | Missing  | Unique | Min  | Max    | Mean  | StDev | Sum      | Percentile |       |       |             |       |        |        |
|-----------------|----------|--------|------|--------|-------|-------|----------|------------|-------|-------|-------------|-------|--------|--------|
|                 |          |        |      |        |       |       |          | 0.05       | 0.10  | 0.25  | 0.50 Median | 0.75  | 0.90   | 0.95   |
| 55              | 4 (6.8%) | 31     | 0.00 | 100.00 | 70.78 | 32.83 | 3,893.00 | 4.40       | 13.40 | 60.00 | 87.00       | 97.00 | 100.00 | 100.00 |

**Lowest values:** 0, 0, 3, 5, 11

**Highest values:** 100, 100, 100, 100, 100

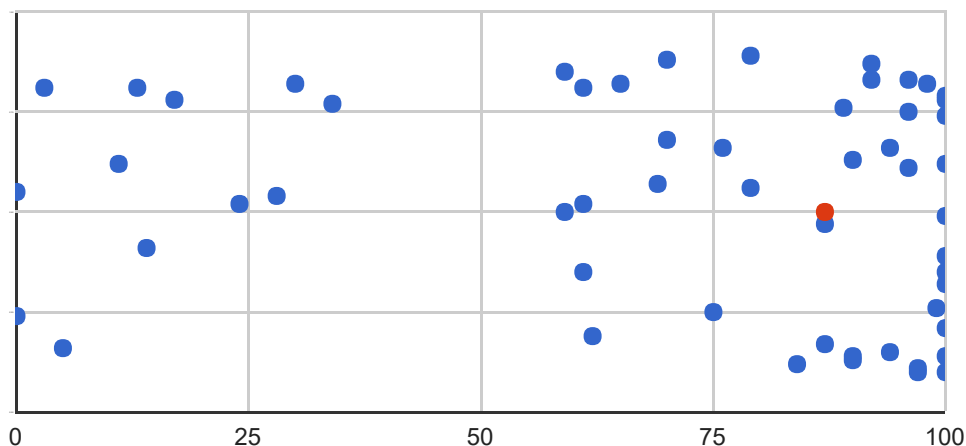

[Download image](#)

**For ADULTS 18 and over, given concerns of side effects and rebound flares on discontinuation, systemic corticosteroids may be used rarely for severe atopic dermatitis.**

| Total Count (N) | Missing  | Unique | Min  | Max    | Mean  | StDev | Sum      | Percentile |       |       |             |       |        |        |
|-----------------|----------|--------|------|--------|-------|-------|----------|------------|-------|-------|-------------|-------|--------|--------|
|                 |          |        |      |        |       |       |          | 0.05       | 0.10  | 0.25  | 0.50 Median | 0.75  | 0.90   | 0.95   |
| 55              | 4 (6.8%) | 35     | 0.00 | 100.00 | 69.67 | 29.73 | 3,832.00 | 5.40       | 18.40 | 57.00 | 77.00       | 95.00 | 100.00 | 100.00 |

**Lowest values:** 0, 0, 4, 6, 17

**Highest values:** 100, 100, 100, 100, 100

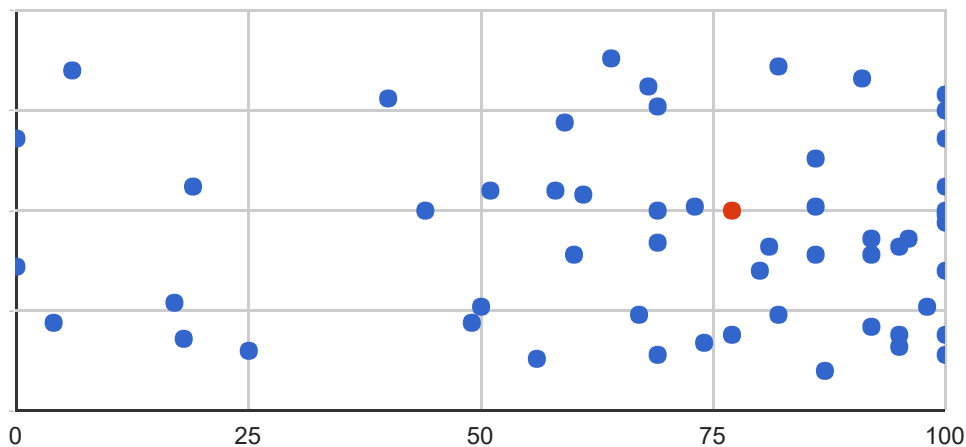

[Download image](#)

**For ADULTS 18 and over, given concerns of side effects and rebound flares on discontinuation, systemic corticosteroids may be used regularly for severe atopic dermatitis.**

| Total Count (N) | Missing  | Unique | Min  | Max    | Mean  | StDev | Sum    | Percentile |      |      |             |       |       |       |
|-----------------|----------|--------|------|--------|-------|-------|--------|------------|------|------|-------------|-------|-------|-------|
|                 |          |        |      |        |       |       |        | 0.05       | 0.10 | 0.25 | 0.50 Median | 0.75  | 0.90  | 0.95  |
| 55              | 4 (6.8%) | 19     | 0.00 | 100.00 | 10.02 | 17.96 | 551.00 | 0.00       | 0.00 | 0.00 | 2.00        | 12.00 | 30.00 | 35.20 |

Lowest values: 0, 0, 0, 0, 0

Highest values: 32, 34, 38, 63, 100

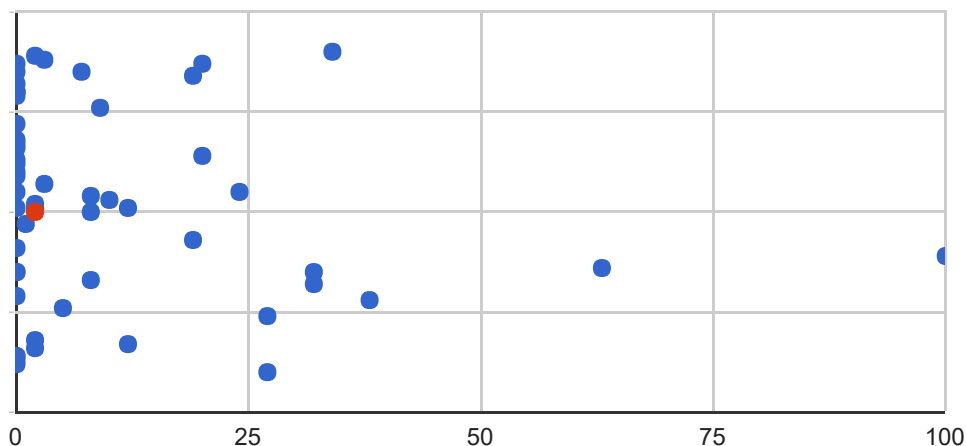

[Download image](#)

**Please use this space to provide any comments you have on the use of systemic corticosteroids for severe atopic dermatitis in adults, including any clarification you would like to provide on your answer choices.**

| Total Count (N) | Missing    |
|-----------------|------------|
| 10              | 49 (83.1%) |

**Systemic corticosteroids may be used for severe atopic dermatitis when there are no other viable treatment options.**

| Total Count (N) | Missing  | Unique | Min  | Max    | Mean  | StDev | Sum      | Percentile |       |       |             |       |       |       |
|-----------------|----------|--------|------|--------|-------|-------|----------|------------|-------|-------|-------------|-------|-------|-------|
|                 |          |        |      |        |       |       |          | 0.05       | 0.10  | 0.25  | 0.50 Median | 0.75  | 0.90  | 0.95  |
| 54              | 5 (8.5%) | 36     | 0.00 | 100.00 | 64.50 | 24.09 | 3,483.00 | 16.95      | 27.30 | 51.75 | 67.50       | 80.00 | 92.40 | 97.40 |

Lowest values: 0, 2, 15, 18, 24

Highest values: 96, 96, 100, 100, 100

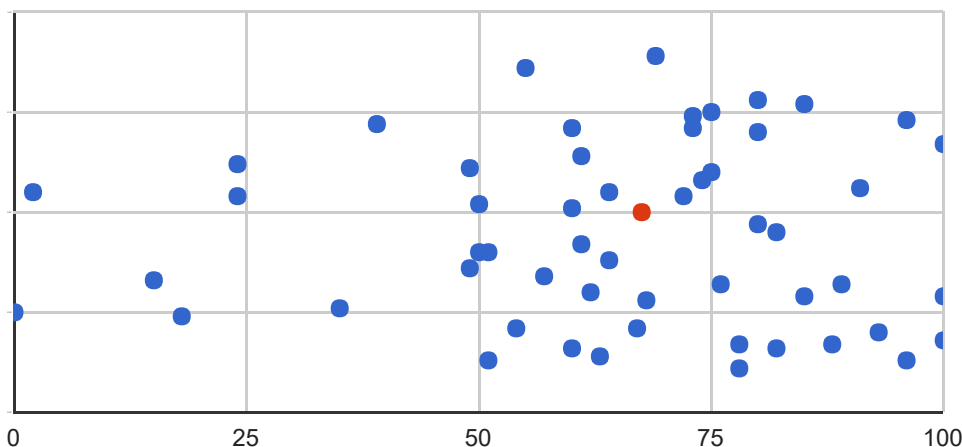

[Download image](#)

**Systemic corticosteroids may be used for severe atopic dermatitis as a bridge to other systemic agents or phototherapy.**

| Total Count (N) | Missing  | Unique | Min  | Max    | Mean  | StDev | Sum      | Percentile |      |       |             |       |       |       |
|-----------------|----------|--------|------|--------|-------|-------|----------|------------|------|-------|-------------|-------|-------|-------|
|                 |          |        |      |        |       |       |          | 0.05       | 0.10 | 0.25  | 0.50 Median | 0.75  | 0.90  | 0.95  |
| 54              | 5 (8.5%) | 39     | 0.00 | 100.00 | 58.07 | 30.56 | 3,136.00 | 0.00       | 2.30 | 38.50 | 69.50       | 78.75 | 90.70 | 91.70 |

Lowest values: 0, 0, 0, 0, 1

Highest values: 91, 91, 93, 100, 100

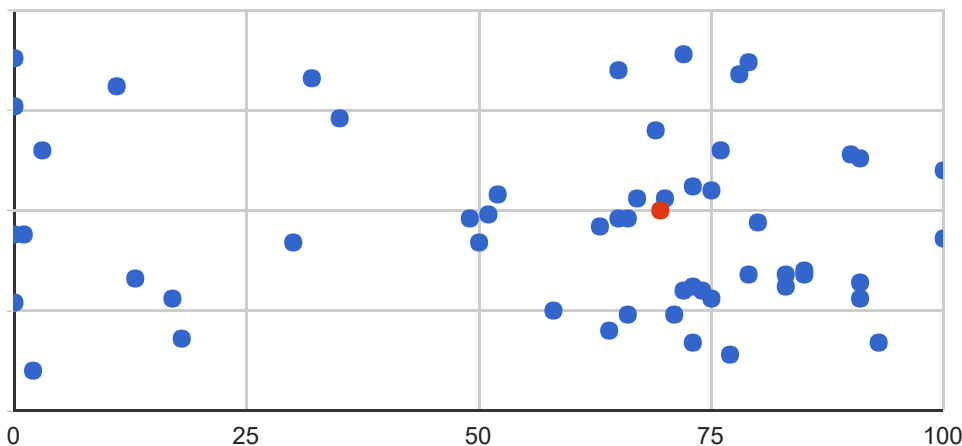

[Download image](#)

**Systemic corticosteroids may be used for severe atopic dermatitis not responding to topical therapy.**



| Total Count (N) | Missing  | Unique | Min  | Max   | Mean  | StDev | Sum      | Percentile |      |      |             |       |       |       |
|-----------------|----------|--------|------|-------|-------|-------|----------|------------|------|------|-------------|-------|-------|-------|
|                 |          |        |      |       |       |       |          | 0.05       | 0.10 | 0.25 | 0.50 Median | 0.75  | 0.90  | 0.95  |
| 54              | 5 (8.5%) | 34     | 0.00 | 98.00 | 36.24 | 30.40 | 1,957.00 | 0.00       | 0.00 | 8.50 | 29.50       | 64.00 | 74.70 | 91.00 |

Lowest values: 0, 0, 0, 0, 0

Highest values: 80, 91, 91, 94, 98

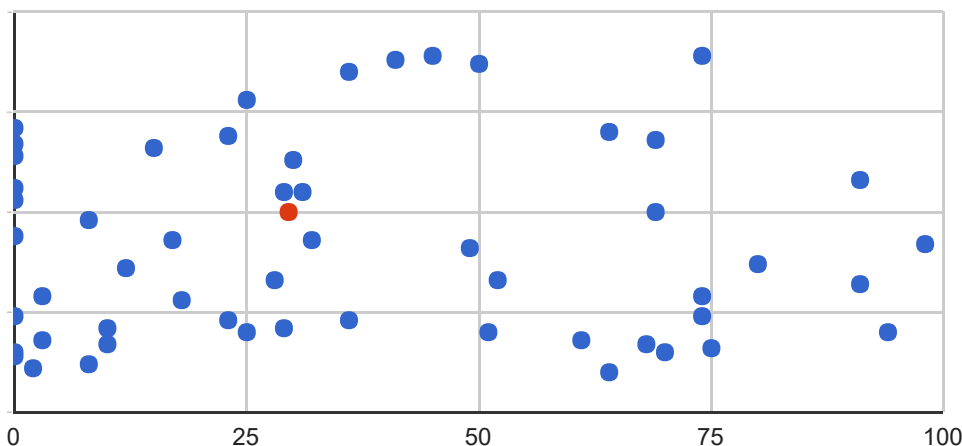

[Download image](#)

**Systemic corticosteroids may be used for severe atopic dermatitis not responding to other systemic medications or phototherapy.**

| Total Count (N) | Missing  | Unique | Min  | Max    | Mean  | StDev | Sum      | Percentile |      |       |             |       |       |       |
|-----------------|----------|--------|------|--------|-------|-------|----------|------------|------|-------|-------------|-------|-------|-------|
|                 |          |        |      |        |       |       |          | 0.05       | 0.10 | 0.25  | 0.50 Median | 0.75  | 0.90  | 0.95  |
| 54              | 5 (8.5%) | 33     | 0.00 | 100.00 | 53.52 | 28.11 | 2,890.00 | 0.00       | 3.00 | 38.75 | 63.00       | 73.75 | 81.00 | 87.75 |

Lowest values: 0, 0, 0, 0, 0

Highest values: 83, 86, 91, 97, 100

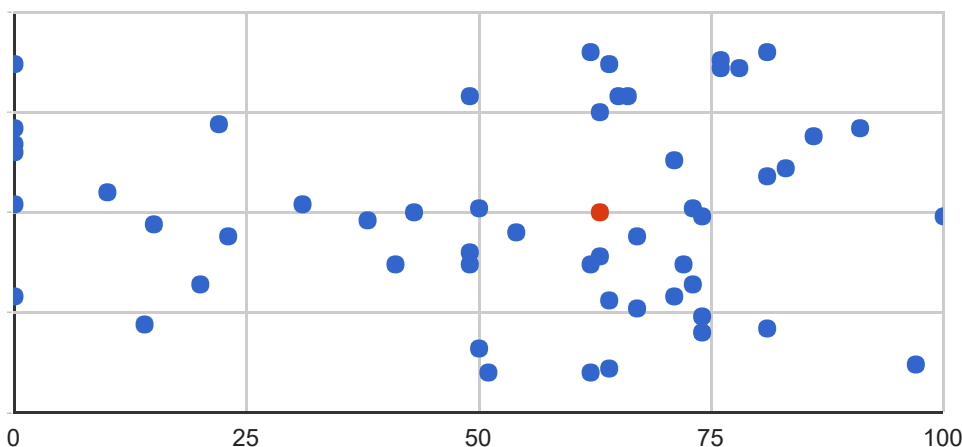

[Download image](#)

**Systemic corticosteroids may be used for severe atopic dermatitis in an acute flare in need of immediate relief.**

| Total | Missing | Unique | Min | Max | Mean | StDev | Sum | Percentile |  |  |  |  |  |
|-------|---------|--------|-----|-----|------|-------|-----|------------|--|--|--|--|--|
|-------|---------|--------|-----|-----|------|-------|-----|------------|--|--|--|--|--|

| Count (N) |                 |    |      |        |       |       |          | 0.05 | 0.10 | 0.25  | 0.50 Median | 0.75  | 0.90  | 0.95   |
|-----------|-----------------|----|------|--------|-------|-------|----------|------|------|-------|-------------|-------|-------|--------|
| 54        | <u>5 (8.5%)</u> | 35 | 0.00 | 100.00 | 65.35 | 31.45 | 3,529.00 | 0.00 | 7.60 | 52.75 | 75.50       | 88.00 | 99.70 | 100.00 |

Lowest values: 0, 0, 0, 0, 0

Highest values: 100, 100, 100, 100, 100

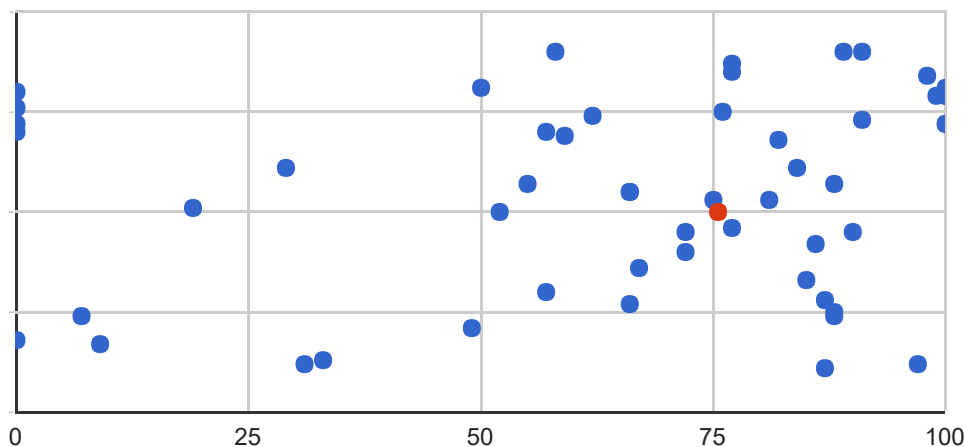

[Download image](#)

**Systemic corticosteroids may be used for severe atopic dermatitis in anticipation of an important life event (eg. wedding).**

| Total Count (N) | Missing          | Unique | Min  | Max    | Mean  | StDev | Sum      | Percentile |       |       |             |       |       |       |
|-----------------|------------------|--------|------|--------|-------|-------|----------|------------|-------|-------|-------------|-------|-------|-------|
|                 |                  |        |      |        |       |       |          | 0.05       | 0.10  | 0.25  | 0.50 Median | 0.75  | 0.90  | 0.95  |
| 53              | <u>6 (10.2%)</u> | 33     | 0.00 | 100.00 | 62.17 | 27.19 | 3,295.00 | 0.00       | 25.40 | 50.00 | 66.00       | 83.00 | 89.40 | 99.40 |

Lowest values: 0, 0, 0, 0, 10

Highest values: 91, 99, 100, 100, 100

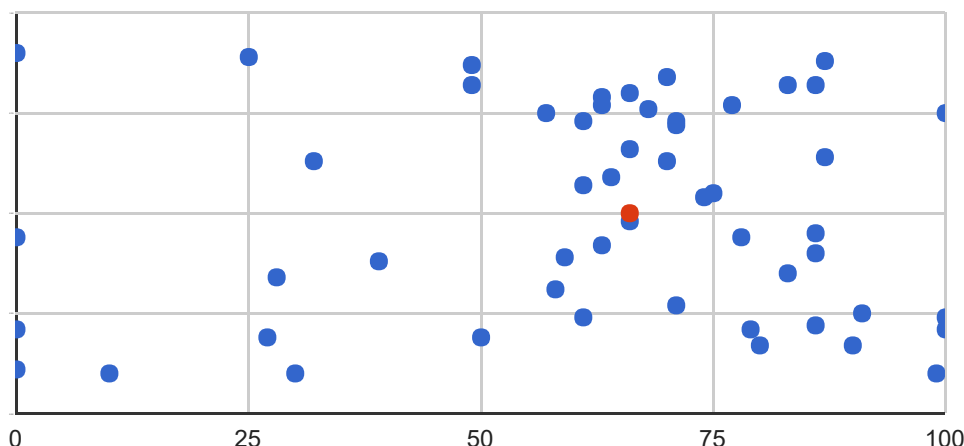

[Download image](#)

**Systemic corticosteroids may be used for severe atopic dermatitis in cases that are the most severe (eg. erythrodermic).**

| Total Count (N) | Missing | Unique | Min | Max | Mean | StDev | Sum | Percentile |      |      |             |      |      |      |
|-----------------|---------|--------|-----|-----|------|-------|-----|------------|------|------|-------------|------|------|------|
|                 |         |        |     |     |      |       |     | 0.05       | 0.10 | 0.25 | 0.50 Median | 0.75 | 0.90 | 0.95 |

|    |                  |    |      |        |       |       |          |      |       |       |       |       |       |       |
|----|------------------|----|------|--------|-------|-------|----------|------|-------|-------|-------|-------|-------|-------|
| 53 | <u>6 (10.2%)</u> | 42 | 0.00 | 100.00 | 59.66 | 28.79 | 3,162.00 | 0.60 | 13.60 | 49.00 | 64.00 | 78.00 | 95.40 | 99.40 |
|----|------------------|----|------|--------|-------|-------|----------|------|-------|-------|-------|-------|-------|-------|

Lowest values: 0, 0, 0, 1, 12

Highest values: 97, 99, 100, 100, 100

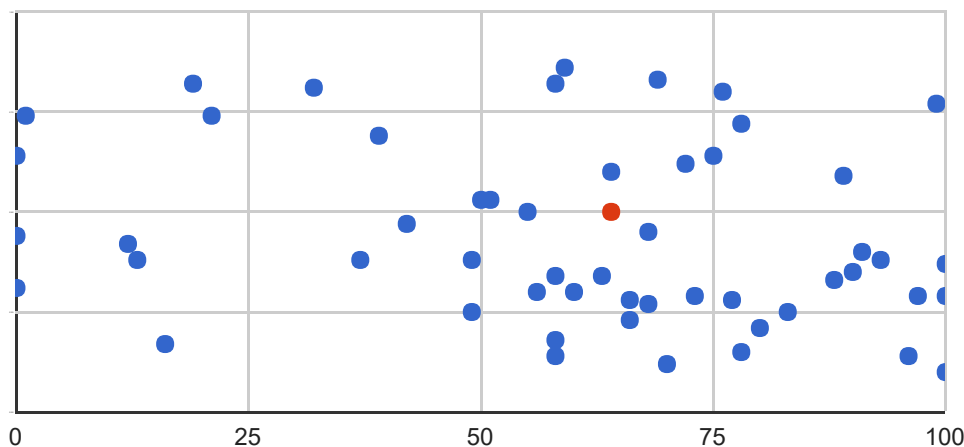

[Download image](#)

**Systemic corticosteroids may be used for severe atopic dermatitis in pregnancy.**

| Total Count (N) | Missing          | Unique | Min  | Max   | Mean  | StDev | Sum      | Percentile |      |       |             |       |       |       |
|-----------------|------------------|--------|------|-------|-------|-------|----------|------------|------|-------|-------------|-------|-------|-------|
|                 |                  |        |      |       |       |       |          | 0.05       | 0.10 | 0.25  | 0.50 Median | 0.75  | 0.90  | 0.95  |
| 53              | <u>6 (10.2%)</u> | 33     | 0.00 | 86.00 | 49.23 | 25.01 | 2,609.00 | 0.00       | 3.60 | 35.00 | 54.00       | 67.00 | 76.80 | 81.00 |

Lowest values: 0, 0, 0, 0, 2

Highest values: 81, 81, 81, 85, 86

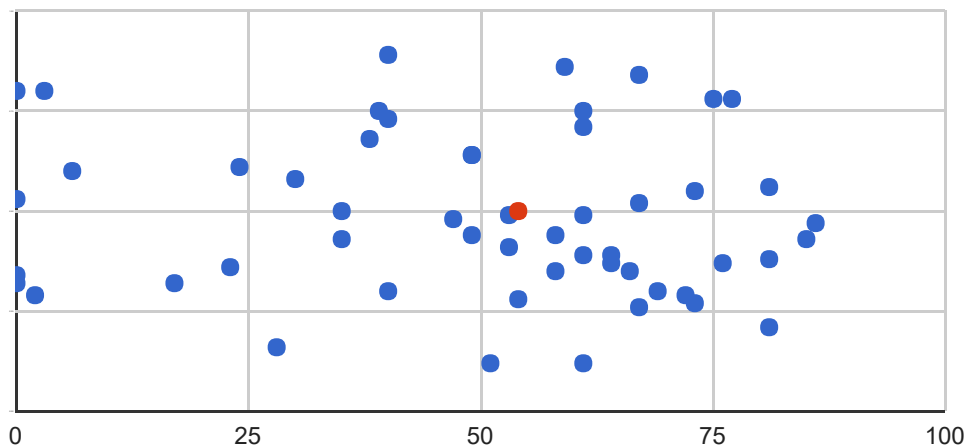

[Download image](#)

**Please use this space to provide any comments you have on the use of systemic corticosteroids for severe atopic dermatitis in specific circumstances, including any clarification you would like to provide on your answer choices.**

| Total Count (N) | Missing           |
|-----------------|-------------------|
| 8               | <u>51 (86.4%)</u> |

**If used, treatment with systemic corticosteroids for severe atopic dermatitis should be limited to short-term use.**

| Total Count (N) | Missing             | Unique | Min  | Max    | Mean  | StDev | Sum      | Percentile |       |       |             |        |        |        |
|-----------------|---------------------|--------|------|--------|-------|-------|----------|------------|-------|-------|-------------|--------|--------|--------|
|                 |                     |        |      |        |       |       |          | 0.05       | 0.10  | 0.25  | 0.50 Median | 0.75   | 0.90   | 0.95   |
| 53              | <u>6</u><br>(10.2%) | 22     | 0.00 | 100.00 | 86.34 | 22.71 | 4,576.00 | 44.40      | 62.00 | 83.00 | 98.00       | 100.00 | 100.00 | 100.00 |

Lowest values: 0, 0, 36, 50, 59

Highest values: 100, 100, 100, 100, 100

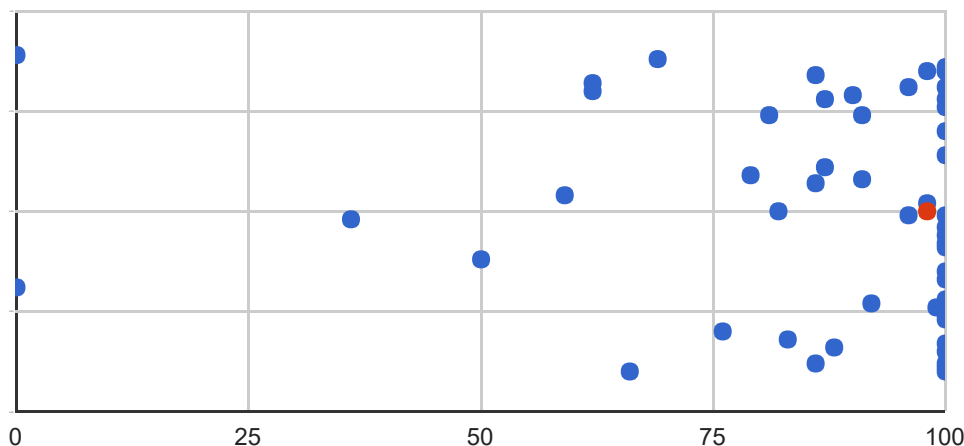

[Download image](#)

**If used, treatment with systemic corticosteroids for severe atopic dermatitis should be limited to no more than 2 weeks.**

| Total Count (N) | Missing             | Unique | Min  | Max    | Mean  | StDev | Sum      | Percentile |       |       |             |       |        |        |
|-----------------|---------------------|--------|------|--------|-------|-------|----------|------------|-------|-------|-------------|-------|--------|--------|
|                 |                     |        |      |        |       |       |          | 0.05       | 0.10  | 0.25  | 0.50 Median | 0.75  | 0.90   | 0.95   |
| 52              | <u>7</u><br>(11.9%) | 36     | 0.00 | 100.00 | 64.67 | 29.53 | 3,363.00 | 2.55       | 24.60 | 42.00 | 68.00       | 91.00 | 100.00 | 100.00 |

Lowest values: 0, 2, 2, 3, 21

Highest values: 100, 100, 100, 100, 100

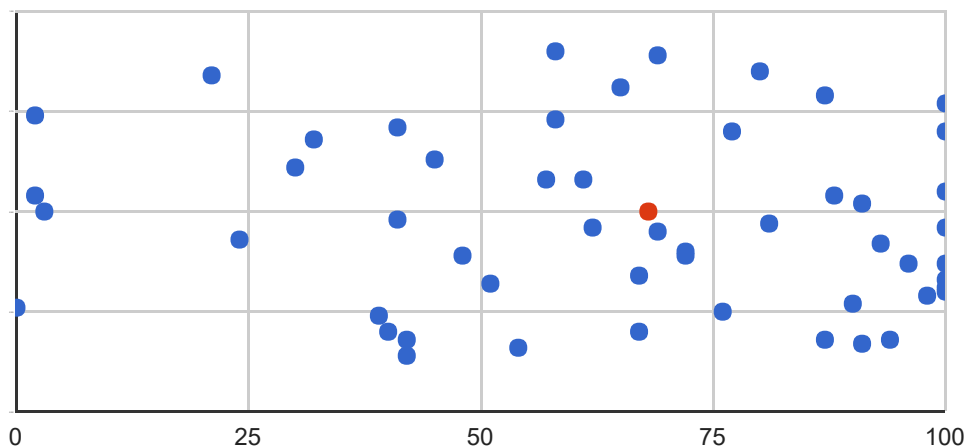

[Download image](#)

**If used, treatment with systemic corticosteroids for severe atopic dermatitis should be limited to no more than 4 weeks.**

| Total Count (N) | Missing   | Unique | Min  | Max    | Mean  | StDev | Sum      | Percentile |      |       |             |       |       |        |
|-----------------|-----------|--------|------|--------|-------|-------|----------|------------|------|-------|-------------|-------|-------|--------|
|                 |           |        |      |        |       |       |          | 0.05       | 0.10 | 0.25  | 0.50 Median | 0.75  | 0.90  | 0.95   |
| 53              | 6 (10.2%) | 34     | 0.00 | 100.00 | 51.32 | 35.20 | 2,720.00 | 0.00       | 0.00 | 20.00 | 63.00       | 77.00 | 99.60 | 100.00 |

Lowest values: 0, 0, 0, 0, 0

Highest values: 100, 100, 100, 100, 100

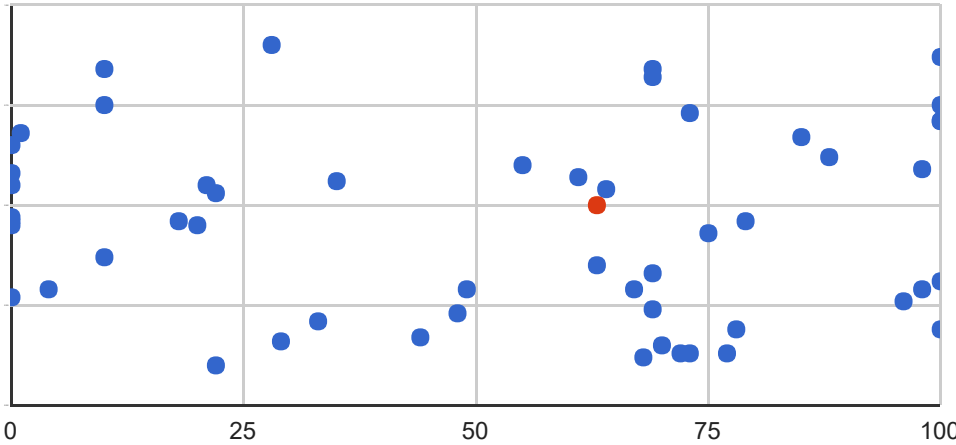

**If used, treatment with systemic corticosteroids for severe atopic dermatitis should be limited to no more than 6 weeks.**

| Total Count (N) | Missing   | Unique | Min  | Max    | Mean  | StDev | Sum      | Percentile |      |      |             |       |       |        |
|-----------------|-----------|--------|------|--------|-------|-------|----------|------------|------|------|-------------|-------|-------|--------|
|                 |           |        |      |        |       |       |          | 0.05       | 0.10 | 0.25 | 0.50 Median | 0.75  | 0.90  | 0.95   |
| 53              | 6 (10.2%) | 33     | 0.00 | 100.00 | 47.11 | 36.80 | 2,497.00 | 0.00       | 0.00 | 8.00 | 49.00       | 77.00 | 99.80 | 100.00 |

Lowest values: 0, 0, 0, 0, 0

Highest values: 100, 100, 100, 100, 100

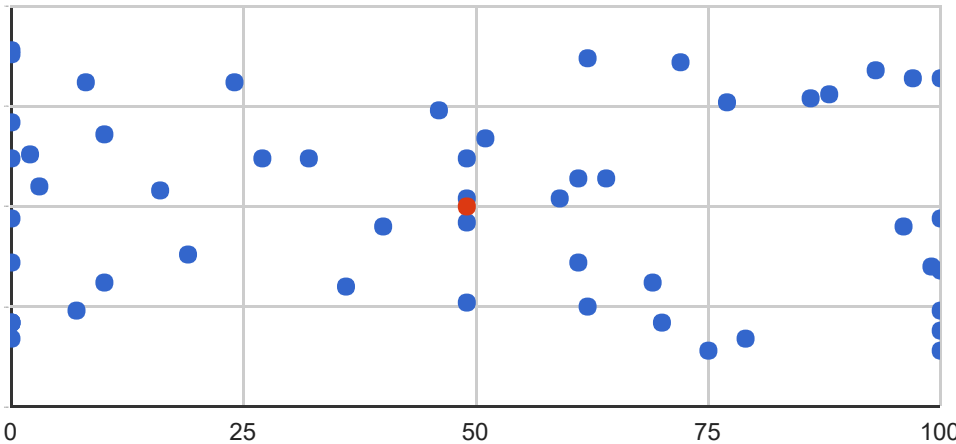

**If used, treatment with systemic corticosteroids for severe atopic dermatitis should be tapered slowly over weeks.**

| Total Count (N) | Missing   | Unique | Min  | Max    | Mean  | StDev | Sum      | Percentile |       |       |             |       |        |        |
|-----------------|-----------|--------|------|--------|-------|-------|----------|------------|-------|-------|-------------|-------|--------|--------|
|                 |           |        |      |        |       |       |          | 0.05       | 0.10  | 0.25  | 0.50 Median | 0.75  | 0.90   | 0.95   |
| 53              | 6 (10.2%) | 37     | 0.00 | 100.00 | 58.60 | 32.80 | 3,106.00 | 0.60       | 11.20 | 32.00 | 64.00       | 84.00 | 100.00 | 100.00 |

Lowest values: 0, 0, 0, 1, 2

Highest values: 100, 100, 100, 100, 100

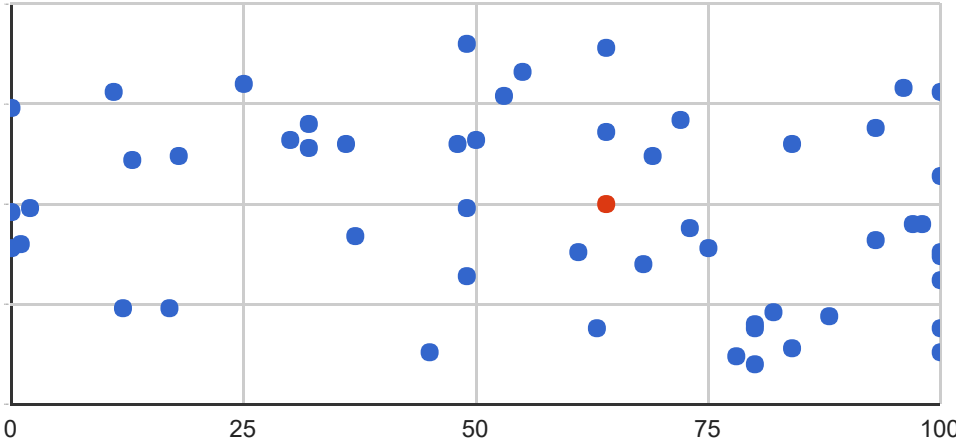

**If used, treatment with systemic corticosteroids for severe atopic dermatitis should be low dose.**

| Total Count (N) | Missing   | Unique | Min  | Max    | Mean  | StDev | Sum      | Percentile |      |       |             |       |       |       |
|-----------------|-----------|--------|------|--------|-------|-------|----------|------------|------|-------|-------------|-------|-------|-------|
|                 |           |        |      |        |       |       |          | 0.05       | 0.10 | 0.25  | 0.50 Median | 0.75  | 0.90  | 0.95  |
| 52              | 7 (11.9%) | 39     | 0.00 | 100.00 | 46.13 | 28.98 | 2,399.00 | 1.55       | 9.20 | 25.00 | 44.50       | 63.00 | 95.40 | 98.45 |

Lowest values: 0, 0, 1, 2, 2

Highest values: 97, 98, 99, 100, 100

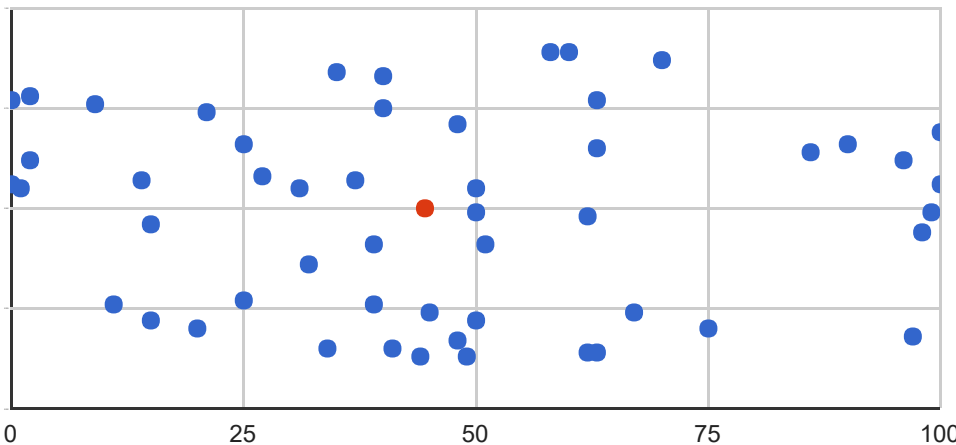

**Please use this space to provide any comments you have on the timing and dosing systemic corticosteroids for severe atopic dermatitis, including any clarification you would like to provide on your answer choices.**

| Total Count (N) | Missing    |
|-----------------|------------|
| 8               | 51 (86.4%) |

**Please use this space to provide any further comments on the subject of the use of systemic corticosteroids for severe atopic dermatitis.**

| Total Count (N) | Missing    |
|-----------------|------------|
| 13              | 46 (78.0%) |

## Complete?

| Total Count (N) | Missing  | Unique |
|-----------------|----------|--------|
| 59              | 0 (0.0%) | 2      |

**Counts/frequency:** Incomplete (7, 11.9%), Unverified (0, 0.0%), Complete (52, 88.1%)

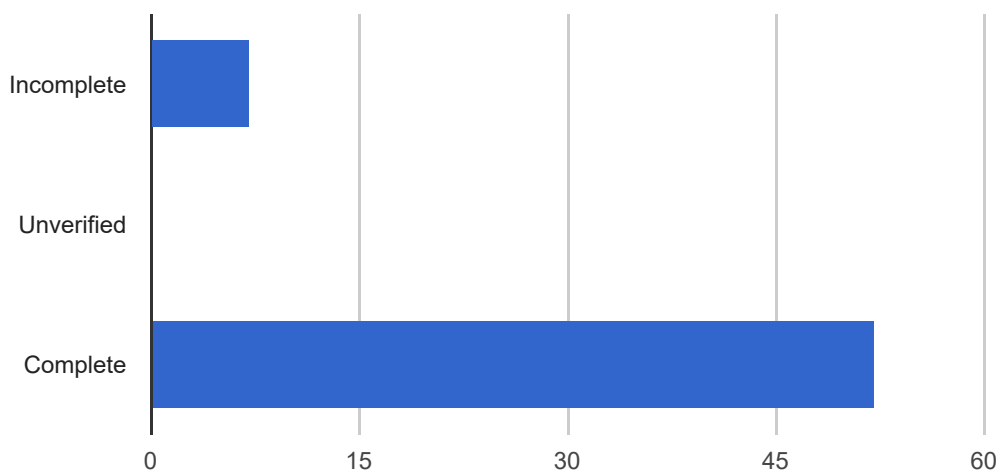

[Download image](#)
